# Supplementary material for: Molecular Evolution of Porcine Reproductive and Respiratory Syndrome Virus Field Strains from Two Swine Production Systems in the Midwestern United States from 2001 to 2020
Source: PubMed Central journal article supplement (PMC9241855; doi:10.1128/spectrum.02634-21), 2022-05-02
Supplement: spectrum.02634-21-s002.pdf [file spectrum.02634-21-s002.pdf]

## SUPPLEMENTARY DOCUMENT

### FIGURES:

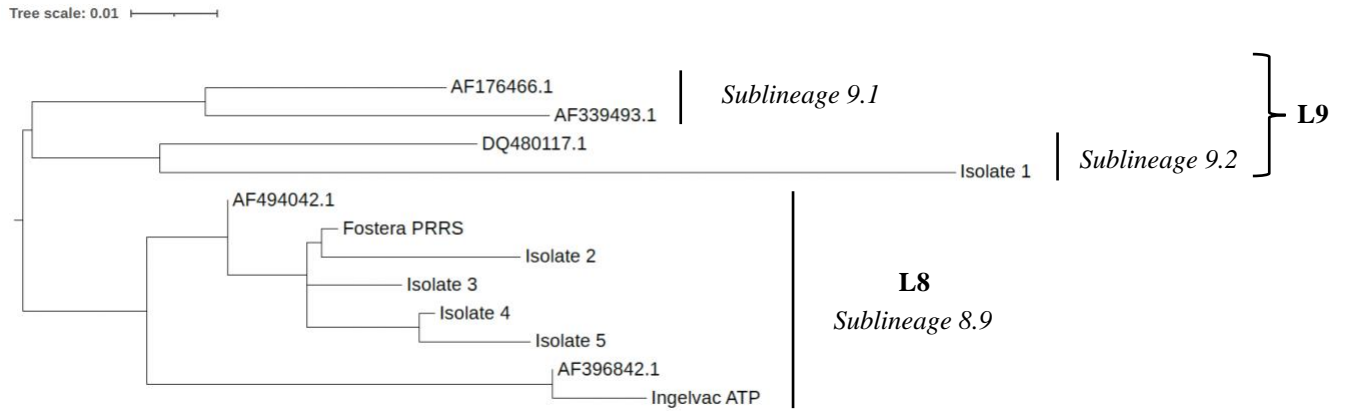

**FIG S1** Maximum likelihood-based phylogenetic tree of the five ORF5 sequences that belonged to the L8 and L9 lineages, according to the global PRRSV lineage classification systems. The five ORF5 sequences are represented by Isolate 1-5.

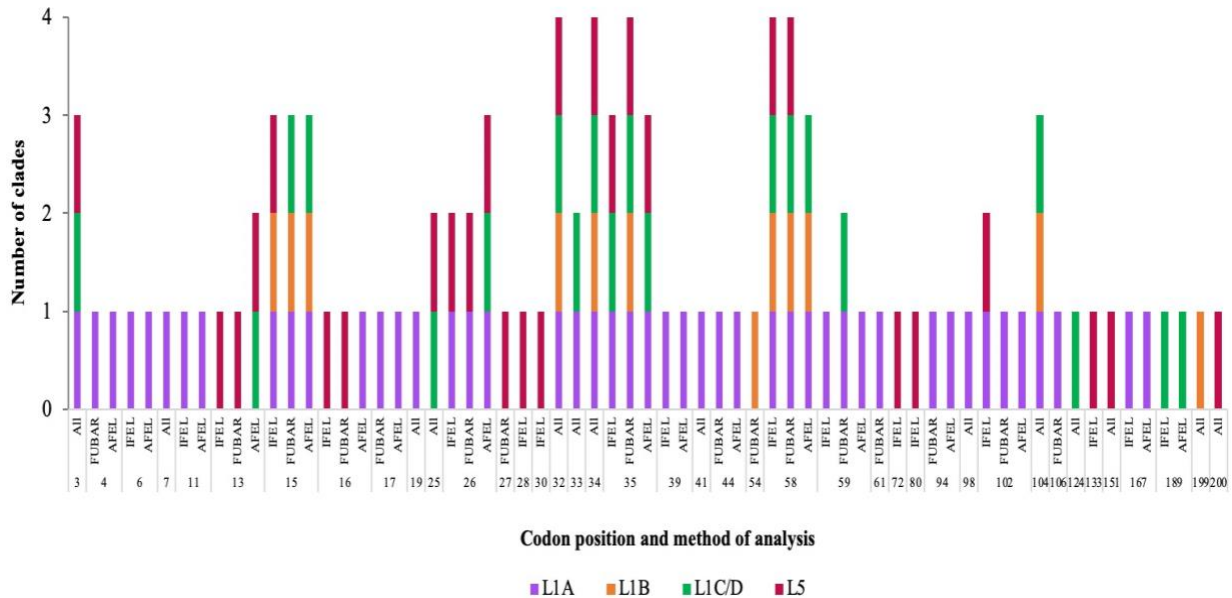

**FIG S2** Significant positive selection sites identified by FUBAR, FEL, and IFEL methods. “All” on the x-axis indicates all methods.

**TABLES:**

**TABLE S1** PRRSV reference sequences used in this study.

| No. | Virus strain               | Accession no. | Lineage/Sublineage <sup>a</sup> | New labels <sup>b</sup> | No. | Virus strain   | Accession no. | Lineage/Sublineage <sup>a</sup> | New labels <sup>b</sup> |
|-----|----------------------------|---------------|---------------------------------|-------------------------|-----|----------------|---------------|---------------------------------|-------------------------|
| 1   | 98-3298                    | DQ306877      | 1.1                             | -                       | 36  | Aichi N20      | AB175715      | 7                               | L7                      |
| 2   | 98-3403                    | DQ306878      | 1.1                             | -                       | 37  | Neb-1          | EU755263      | 7                               | L7                      |
| 3   | 99-3584                    | DQ306879      | 1.1                             | -                       | 38  | CH-1a          | AY032626      | 8.1                             | L8                      |
| 4   | PRRSV-2_Hungary_102_2012   | KM514315      | 1.2                             | -                       | 39  | HH08           | JX679179      | 8.1                             | L8                      |
| 5   | K05-0050                   | JQ656133      | 1.2                             | -                       | 40  | HBJM2          | EU399826      | 8.2                             | L8                      |
| 6   | 2002-1347                  | EU556211      | 1.5                             | L1A                     | 41  | HBSZ           | EU399825      | 8.2                             | L8                      |
| 7   | FJ0908                     | MK202794      | 1.5                             | L1A                     | 42  | JXA1           | EF112445      | 8.3                             | L8                      |
| 8   | OH/2014/ISU-7              | MF326994      | 1.5                             | L1A                     | 43  | JXwn06         | EF641008      | 8.3                             | L8                      |
| 9   | PRRSV2/Michigan/XW074/2011 | KP283440      | 1.6                             | L1B                     | 44  | TJ             | EU860248      | 8.3                             | L8                      |
| 10  | NADC31                     | JN660150      | 1.6                             | L1B                     | 45  | GXLSN06\962012 | KC618172      | 8.4                             | L8                      |
| 11  | PRRSV2/Indiana/XW054/2012  | KP283421      | 1.6                             | L1B                     | 46  | JXZX2          | EU399849      | 8.4                             | L8                      |
| 12  | 2001-18565                 | EU556201      | 1.7                             | L1C/D                   | 47  | AHW01          | EU399828      | 8.5                             | L8                      |
| 13  | PRRSV2/USA/AP244/2010      | KT902607      | 1.7                             | L1C/D                   | 48  | HeN-2          | FJ237419      | 8.5                             | L8                      |
| 14  | PRRSV2/Michigan/XW090/2011 | KP283456      | 1.7                             | L1C/D                   | 49  | SDSU73         | AY656993      | 8.5                             | L8                      |
| 15  | NADC30                     | JN654459      | 1.8                             | L1C/D                   | 50  | JXZX2          | HQ832215      | 8.4                             | L8                      |
| 16  | CHsx1401                   | KP861625      | 1.8                             | L1C/D                   | 51  | Yunnan-08      | EU819086      | 8.6                             | L8                      |
| 17  | HNhx                       | KX766379      | 1.8                             | L1C/D                   | 52  | HK1            | KF287132      | 8.7                             | L8                      |
| 18  | MN184                      | EF442777      | 1.9                             | L1C/D                   | 53  | HK4            | KF287134      | 8.7                             | L8                      |
| 19  | MN184A                     | DQ176019      | 1.9                             | L1C/D                   | 54  | JA-142         | AF396842      | 8.9                             | L8                      |
| 20  | MN184C                     | EF488739      | 1.9                             | L1C/D                   | 55  | P129           | AF494042      | 8.9                             | L8                      |
| 21  | 03-03056                   | DQ480123      | 1.9                             | L1C/D                   | 56  | 98-6470-1      | AF339493      | 9.1                             | L9                      |
| 22  | 2000-48305                 | EU556178      | 1.9                             | L1C/D                   | 57  | PRRSV44        | AF176466      | 9.1                             | L9                      |
| 23  | PRRSV0000008659            | EU758687      | 2                               | L2                      | 58  | 02-01676       | DQ480117      | 9.2                             | L9                      |
| 24  | PRRSV0000008973            | EU758940      | 2                               | L2                      | 59  | 98-5579-1      | AF339500      | 9.8                             | L9                      |

|    |               |          |     |    |    |                |          |      |    |
|----|---------------|----------|-----|----|----|----------------|----------|------|----|
| 25 | PRRSV0000031  | DQ474791 | 2   | L2 | 60 | B1             | AY318773 | 9.9  | L9 |
| 26 | FJ-1          | AY881994 | 3   | L3 | 61 | PRRSV16        | AF176438 | 9.9  | L9 |
| 27 | GD-KP         | KU978619 | 3   | L3 | 62 | 2002-5252C     | EU556220 | 9.12 | L9 |
| 28 | GM2           | JN662424 | 3   | L3 | 63 | 03-07053       | DQ480124 | 9.13 | L9 |
| 29 | Ibaraki08\965 | AB546113 | 4   | L4 | 64 | 2000-54471A    | EU556182 | 9.15 | L9 |
| 30 | Miyagi08\962  | AB546105 | 4   | L4 | 65 | Prevacant PRRS |          | 1.7  | L1 |
| 31 | Miyagi08\963  | AB546106 | 4   | L4 | 66 | Ingelvac MLV   |          | 5    | L5 |
| 32 | VR-2332       | AY150564 | 5   | L5 | 67 | Asian PRRS     |          | 8    | L8 |
| 33 | PA8           | AH006184 | 5.1 | L5 | 68 | PrimePac       | AF066384 | 7    | L7 |
| 34 | NADC-8        | AF396833 | 5.2 | L5 | 69 | Ingelvac ATP   | DQ988080 | 8    | L8 |
| 35 | NVSL-14       | AF396839 | 6   | L6 | 70 | Fostera PRRS   |          | 8    | L8 |

<sup>a</sup> Based on Shi M, Lam TT-Y, Hon C-C, Murtaugh MP, Davies PR, Hui RK-H, Li J, Wong LT-W, Yip C-W, Jiang J-W, Leung FC-C. 2010. Phylogeny-based evolutionary, demographical, and geographical dissection of North American type 2 porcine reproductive and respiratory syndrome viruses. *J Virol* 84:8700–8711.

<sup>b</sup> We labeled all 2006 ORF5 sequences used in our study according to the lineage/sublineage labels introduced by Paploski IAD, Corzo C, Rovira A, Murtaugh MP, Sanhueza JM, Vilalta C, Schroeder DC, VanderWaal K. 2019. Temporal dynamics of co-circulating lineages of porcine reproductive and respiratory syndrome virus. *Front Microbiol* 10:2486.

**TABLE S2** Significant codon positions that undergo positive selection in L5 and L1 lineages based on IFEL, FEL, and FUBAR methods.

| Lineage | Predicted GP5 region        | FEL <sup>a</sup>                                      | IFEL                                 | FUBAR                                 |
|---------|-----------------------------|-------------------------------------------------------|--------------------------------------|---------------------------------------|
| L5      | Signal peptide              | <b>3, 13, 25, 26, 32</b>                              | 3, 13, 15, 16, 25, 26, 28, 30, 32    | 3, 13, 16, 25, 26, 27, 32             |
|         | Ectodomain                  | <b>34, 35</b>                                         | 34, 35, 58                           | 34, 35, 58                            |
|         | Transmembrane<br>Endodomain | <b>151, 200</b>                                       | 72, 80, 102, 133<br>151, 200         | 151, 200                              |
| L1      | Signal peptide              | <b>3, 4, 6, 8, 11, 15, 16, 17, 19, 24, 25, 26, 32</b> | 3, 8, 11, 15, 16, 17, 19, 25, 26, 32 | 3, 11, 15, 16, 17, 19, 24, 25, 26, 32 |
|         | Ectodomain                  | <b>33, 34, 35, 39, 41, 58, 59</b>                     | 33, 34, 35, 41, 58, 59               | 33, 34, 35, 39, 41, 44, 58, 59        |
|         | Transmembrane               | <b>98, 102, 104</b>                                   | 98, 102, 104                         | 94, 98, 102, 104, 106                 |
|         | Endodomain                  | <b>189, 196</b>                                       | 189                                  | 189                                   |

<sup>a</sup> The sites in bold letters were common in all three methods in both L5 and L1 lineages.

**TABLE S3** Major amino acid at each positive selection site and the frequency (%) within the L1 sublineages (L1A, L1B, and L1C/D) and L5 lineage.

| Site | L1A |      | L1B |       | L1C/D |       | L5 |       |
|------|-----|------|-----|-------|-------|-------|----|-------|
|      | AA  | %    | AA  | %     | AA    | %     | AA | %     |
| 3    | G   | 93.6 | G   | 92.8  | G     | 56.3  | E  | 82.6  |
| 15   | P   | 83.8 | L   | 85.5  | P     | 72.4  | L  | 99.1  |
| 16   | F   | 99.1 | F   | 100.0 | F     | 100.0 | S  | 96.1  |
| 26   | V   | 98.3 | V   | 94.2  | A     | 96.5  | A  | 98.4  |
| 27   | A   | 98.9 | A   | 91.3  | A     | 99.0  | V  | 98.2  |
| 32   | N   | 80.9 | S   | 73.9  | S     | 84.4  | S  | 94.5  |
| 33   | N   | 73.1 | N   | 91.3  | S     | 42.7  | N  | 90.6  |
| 34   | S   | 71.3 | N   | 58.0  | N     | 73.9  | D  | 75.8  |
| 58   | K   | 75.9 | K   | 40.6  | N     | 60.8  | N  | 91.8  |
| 59   | S   | 85.9 | K   | 65.2  | K     | 53.8  | K  | 99.3  |
| 94   | I   | 91.1 | I   | 91.3  | I     | 96.0  | V  | 99.3  |
| 98   | A   | 83.7 | A   | 53.6  | T     | 91.5  | T  | 100.0 |
| 102  | Y   | 90.8 | S   | 47.8  | Y     | 74.4  | V  | 99.3  |

|     |   |      |   |       |   |      |   |       |
|-----|---|------|---|-------|---|------|---|-------|
| 151 | K | 80.1 | K | 97.1  | K | 84.4 | I | 34.5  |
| 167 | I | 85.6 | I | 95.7  | V | 92.0 | V | 100.0 |
| 189 | V | 99.7 | V | 100.0 | V | 94.0 | I | 98.6  |

**TABLE S4** Significant positive selection sites and the site-specific  $dN/dS$  ratios of the L1 sublineages (L1A, L1B, and L1C/D) and L5 lineage based on the FUBAR method.

| Predicted GP5 region | L1A  |         | L1B  |         | L1C/D |         | L5   |         |
|----------------------|------|---------|------|---------|-------|---------|------|---------|
|                      | Site | $dN/dS$ | Site | $dN/dS$ | Site  | $dN/dS$ | Site | $dN/dS$ |
| Signal peptide       | 3    | 26.9    | 15   | 10.5    | 3     | 3.9     | 3    | 16.4    |
|                      | 4    | 5.3     |      |         | 15    | 3.9     | 13   | 15.6    |
|                      | 7    | 3.1     |      |         | 25    | 3.7     | 16   | 5.6     |
|                      | 15   | 12.0    |      |         |       |         | 25   | 7.0     |
|                      | 17   | 4.8     |      |         |       |         | 26   | 5.6     |
|                      | 19   | 6.1     |      |         |       |         | 27   | 5.5     |
|                      | 26   | 3.7     |      |         |       |         |      |         |
| Ectodomain           | 32   | 31.6    | 32   | 10.9    | 32    | 14.1    | 32   | 11.2    |
|                      | 33   | 19.8    | 34   | 8.5     | 33    | 17.3    | 34   | 38.1    |
|                      | 34   | 32.4    | 35   | 5.1     | 34    | 16.8    | 35   | 9.0     |
|                      | 35   | 9.6     | 54   | 4.8     | 35    | 13.6    | 58   | 4.9     |
|                      | 41   | 4.7     | 58   | 15.8    | 58    | 7.2     |      |         |
|                      | 44   | 2.7     |      |         | 59    | 2.7     |      |         |
|                      | 58   | 4.5     |      |         |       |         |      |         |
|                      | 59   | 14.6    |      |         |       |         |      |         |
| Transmembrane        | 61   | 2.5     |      |         |       |         |      |         |
|                      | 94   | 3.3     | 104  | 10.9    | 104   | 6.0     |      |         |
|                      | 98   | 5.5     |      |         | 124   | 4.3     |      |         |
|                      | 102  | 8.0     |      |         |       |         |      |         |
|                      | 104  | 5.0     |      |         |       |         |      |         |
| Endodomain           | 106  | 2.9     |      |         |       |         |      |         |
|                      |      |         | 199  | 6.2     |       |         | 151  | 26.2    |
|                      |      |         |      |         |       | 200     | 9.2  |         |
